# Supplementary material for: Investigating Ligand Sphere Perturbations on MnIII–Alkylperoxo Complexes
Source: MDPI journal article supplement (doi:10.3390/molecules29081849), 2024-04-18
Supplement: s1 [file s1]

**Supplementary Information for**  
**Investigating ligand sphere perturbations on Mn<sup>III</sup>-alkylperoxo**  
**complexes**

Samuel A. Brunclik, Elizabeth N. Grotemeyer, Zahra Aghaei, Mohammad Rasel Mian, and Timothy A. Jackson \*

*The University of Kansas, Department of Chemistry and Center for Environmentally Beneficial Catalysis,  
1567 Irving Hill Road, Lawrence, KS 66045, USA.*

\* To whom correspondence should be addressed:

Timothy A. Jackson

Phone: (785) 864-3968

taj@ku.edu

### Characterization of (H<sup>6Me</sup>dpaq<sup>5NO<sub>2</sub></sup>)

<sup>1</sup>H NMR data (500 MHz) for H<sup>6Me</sup>dpaq<sup>5NO<sub>2</sub></sup> (CDCl<sub>3</sub>, δ) = 11.86 (s, 1H), 9.25 (dd, *J* = 9.0, 1.9 Hz; 1H), 9.01 (dd, *J* = 4.1, 2.0 Hz; 1H), 8.76 (d, *J* = 8.9 Hz; 1H), 8.47 (d, *J* = 8.9 Hz; 1H), 7.74 (dd, *J* = 8.9, 4.2 Hz; 1H), 7.63 (d, *J* = 7.7 Hz; 2H), 7.50 (dd, *J* = 7.8, 7.7 Hz; 2H), 6.97 (d, *J* = 7.7 Hz; 2H), 3.98 (s, 4H), 3.57 (s, 2H), 2.42 (s, 6H) ppm. <sup>13</sup>C NMR data (500 MHz) for H<sup>6Me</sup>dpaq<sup>5NO<sub>2</sub></sup> (CDCl<sub>3</sub>, δ) = 170.92 (s, C=O), 158.09 (s, Qu), 157.33 (s, Qu), 148.91 (s, Qu), 140.81 (s, Qu), 138.64 (s, Py), 137.93 (s, Qu), 136.84 (d, Py), 133.22 (s, Qu), 127.87 (s, Qu), 124.64 (s, Qu), 122.02 (s, Py), 120.23 (s, Py), 113.63 (s, Qu), 61.61 (-CH<sub>2</sub>Py), 59.34 (-CH<sub>2</sub>CO-), 24.43 (CH<sub>3</sub>Py) ppm.

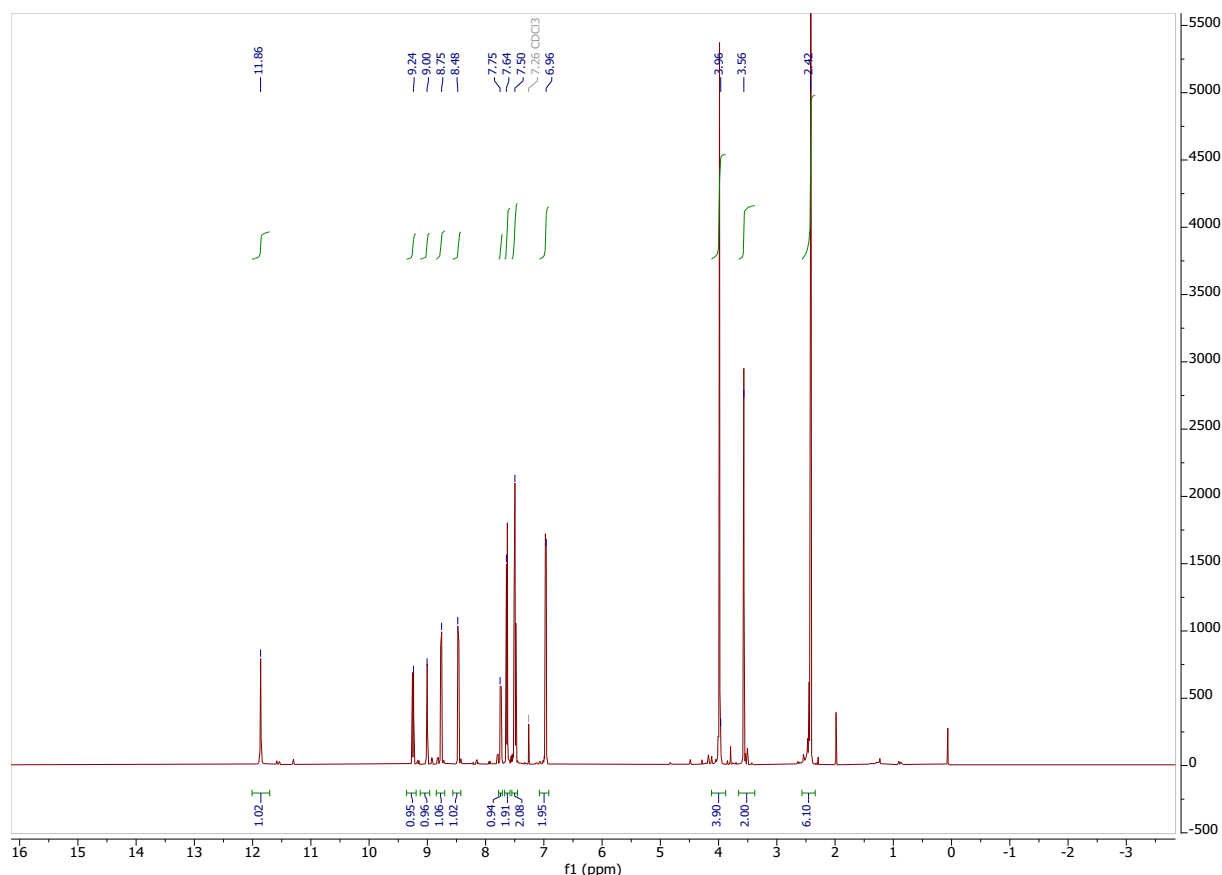

Figure S1. <sup>1</sup>H NMR spectrum of H<sup>6Me</sup>dpaq<sup>5NO<sub>2</sub></sup> dissolved in CDCl<sub>3</sub> at 298 K.

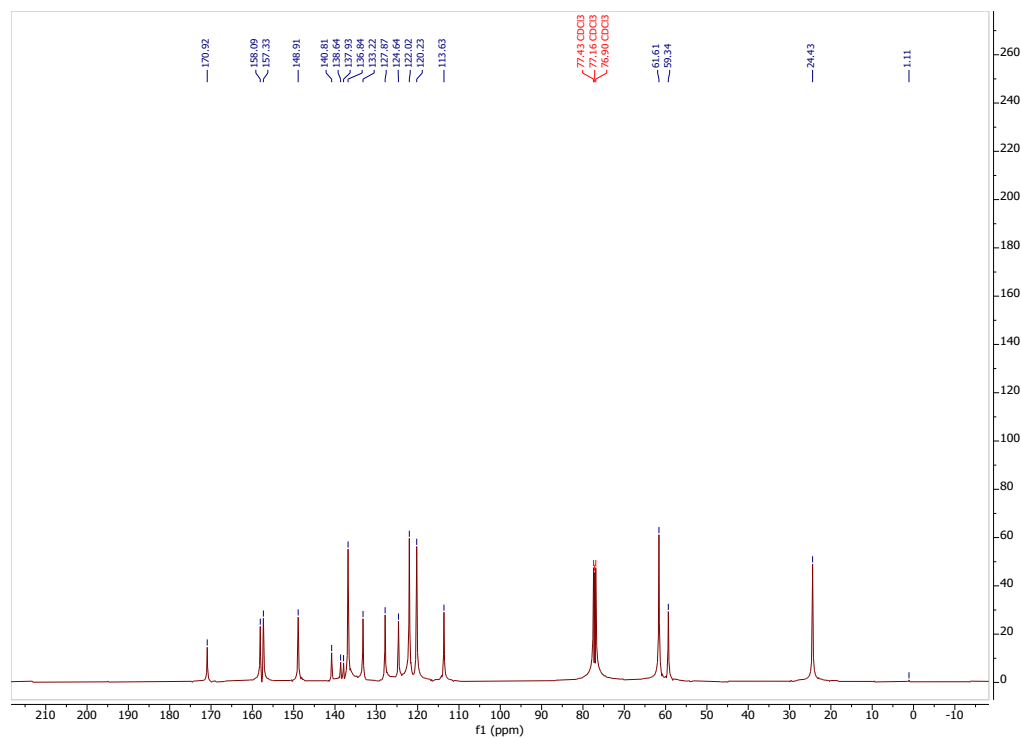

Figure S2.  $^{13}\text{C}$  NMR spectrum of  $\text{H}^6\text{Me dpaq}^{5\text{NO}_2}$  dissolved in  $\text{CDCl}_3$  at 298 K.

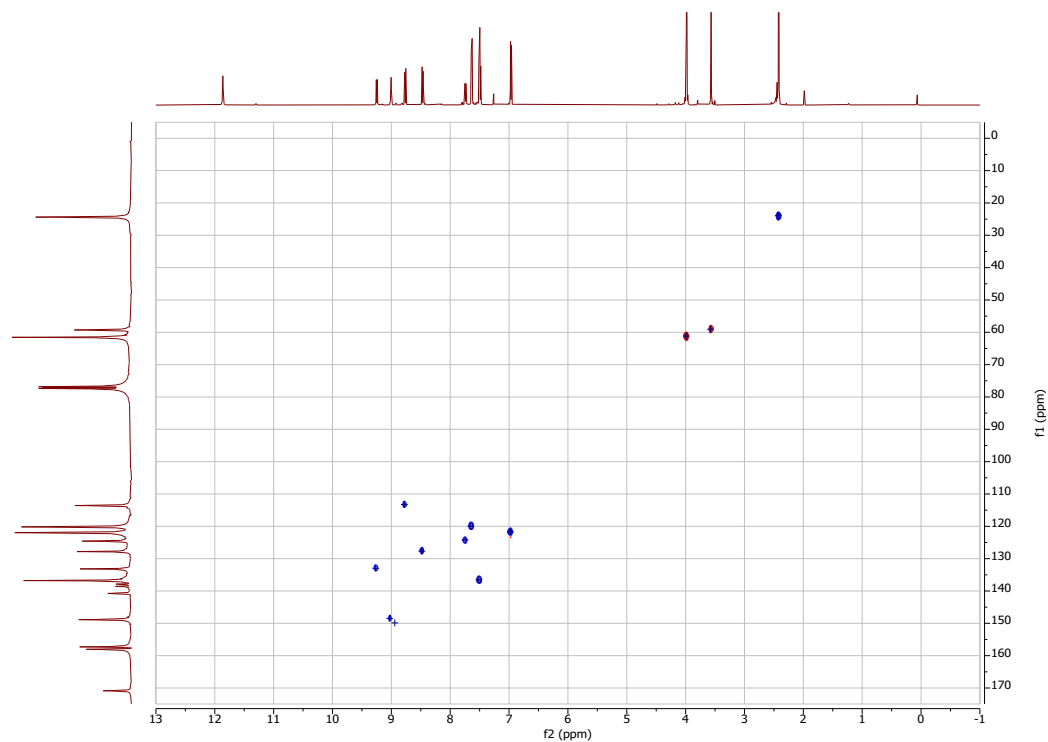

Figure S3. HSQC NMR data for  $\text{H}^6\text{Me dpaq}^{5\text{NO}_2}$  dissolved in  $\text{CDCl}_3$  at 298 K.

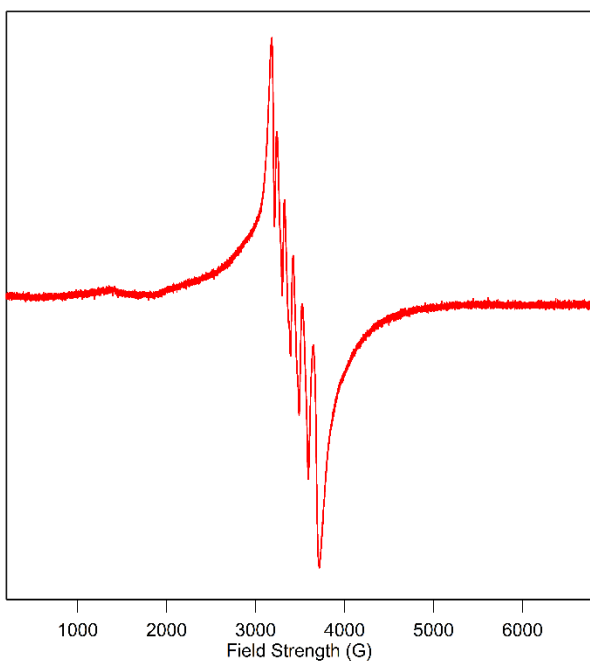

Figure S4. Perpendicular-mode, X-band EPR spectrum of a 2.93 mM solution of **1** dissolved in 1:1 acetonitrile:toluene at 9 K.

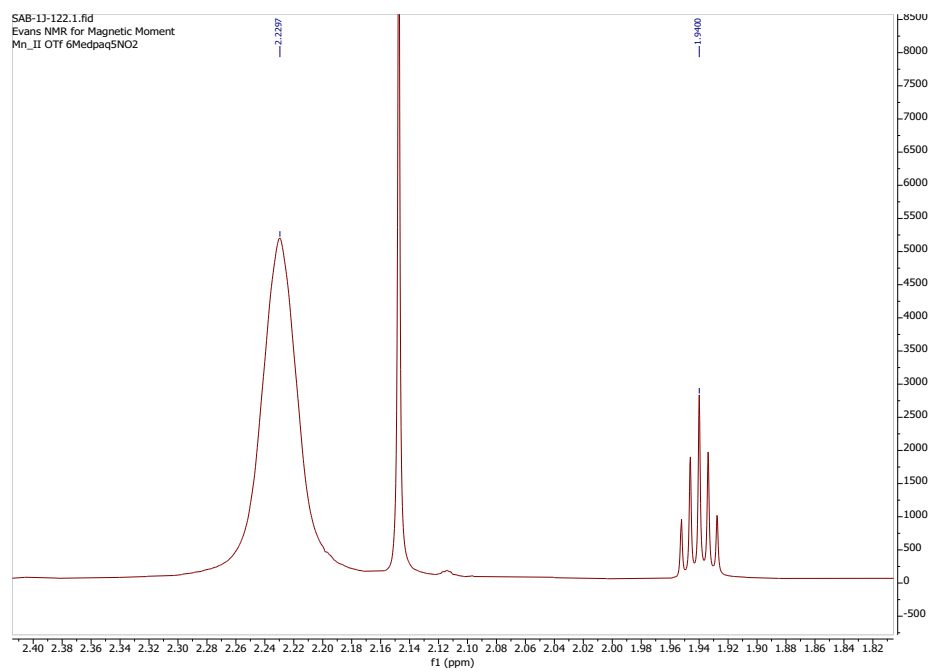

Figure S5. Evans NMR spectrum of **1** in CD<sub>3</sub>CN.

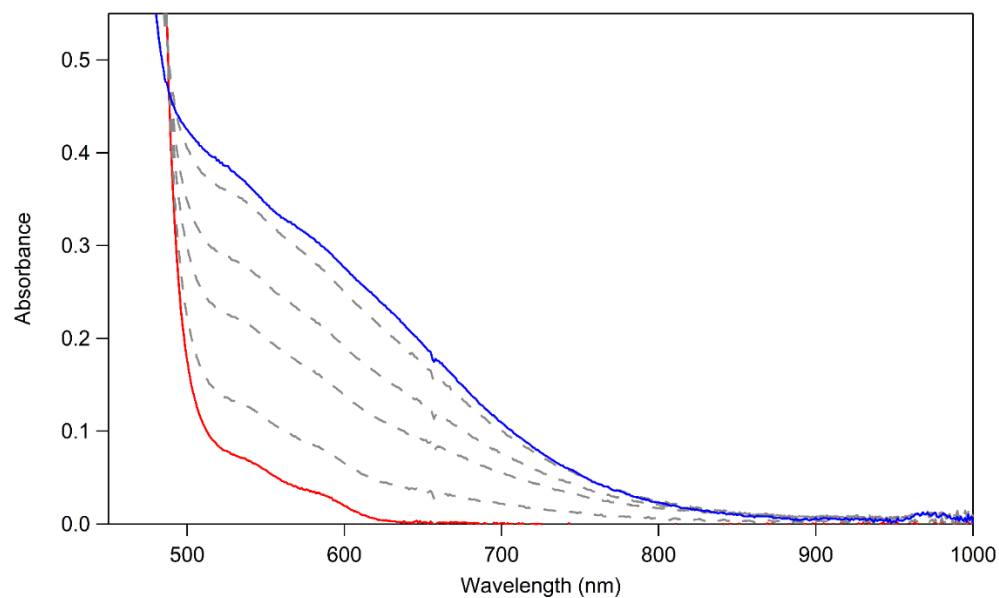

Figure S6. UV-vis spectra of the reaction between of a 1.25 mM solution of **1** and 0.5 equiv. PhIO in CH<sub>3</sub>CN at 323 K. The initial spectrum is in red and the final spectrum is blue.

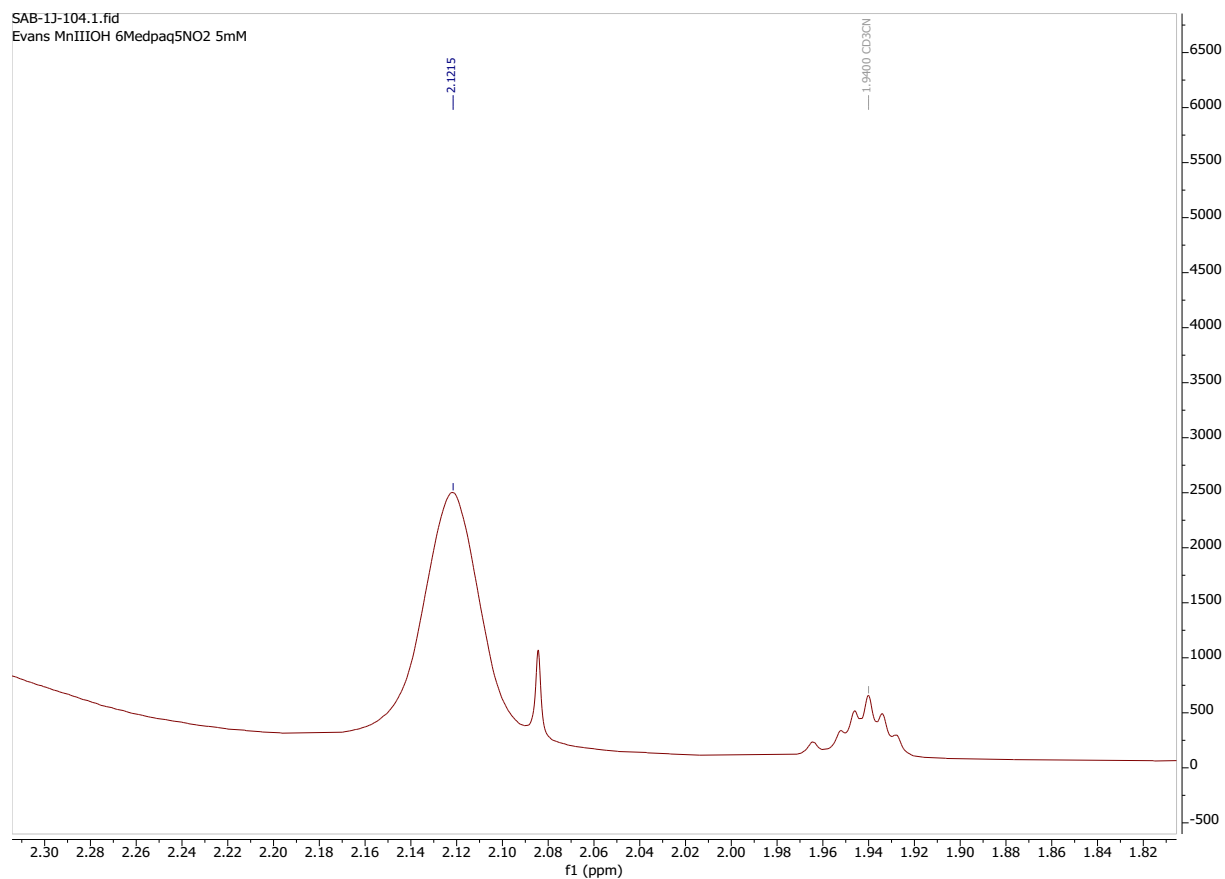

Figure S7. Evans NMR spectrum of **2** in CD<sub>3</sub>CN.

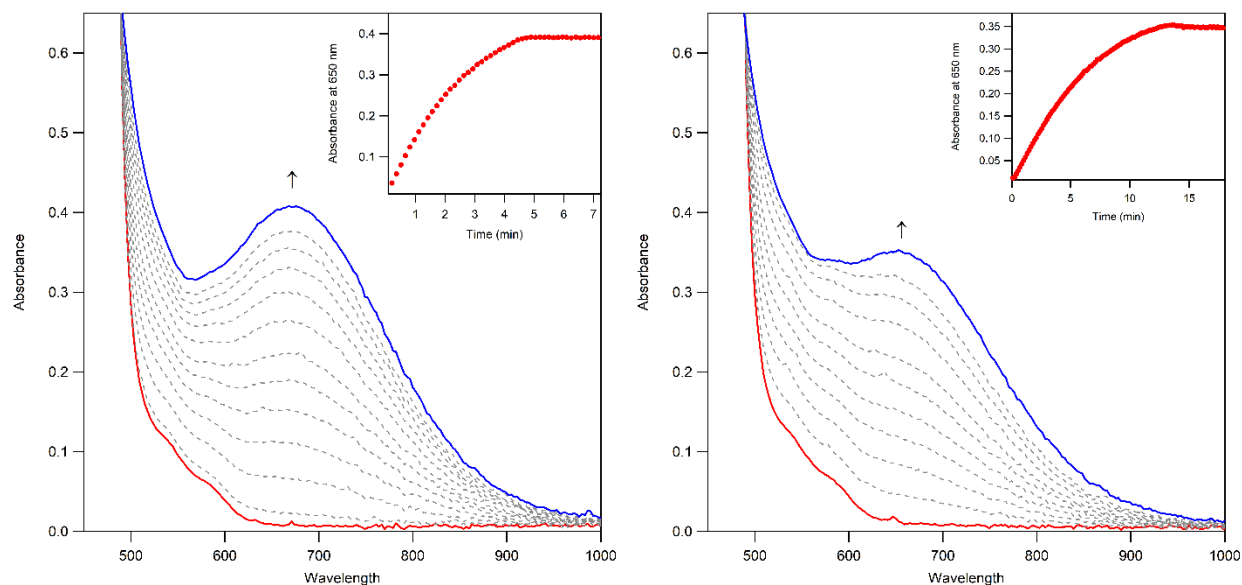

Figure S8. Formation of **3a** (left) and **3b** (right) from the reaction of a 2 mM solution of **1** with 1.5 equiv. *t*BuOOH or CmOOH, respectively, at 313 K in atmosphere. The initial spectrum is in red and the final spectrum is blue. Absorbance at 650 nm over time is shown inset.

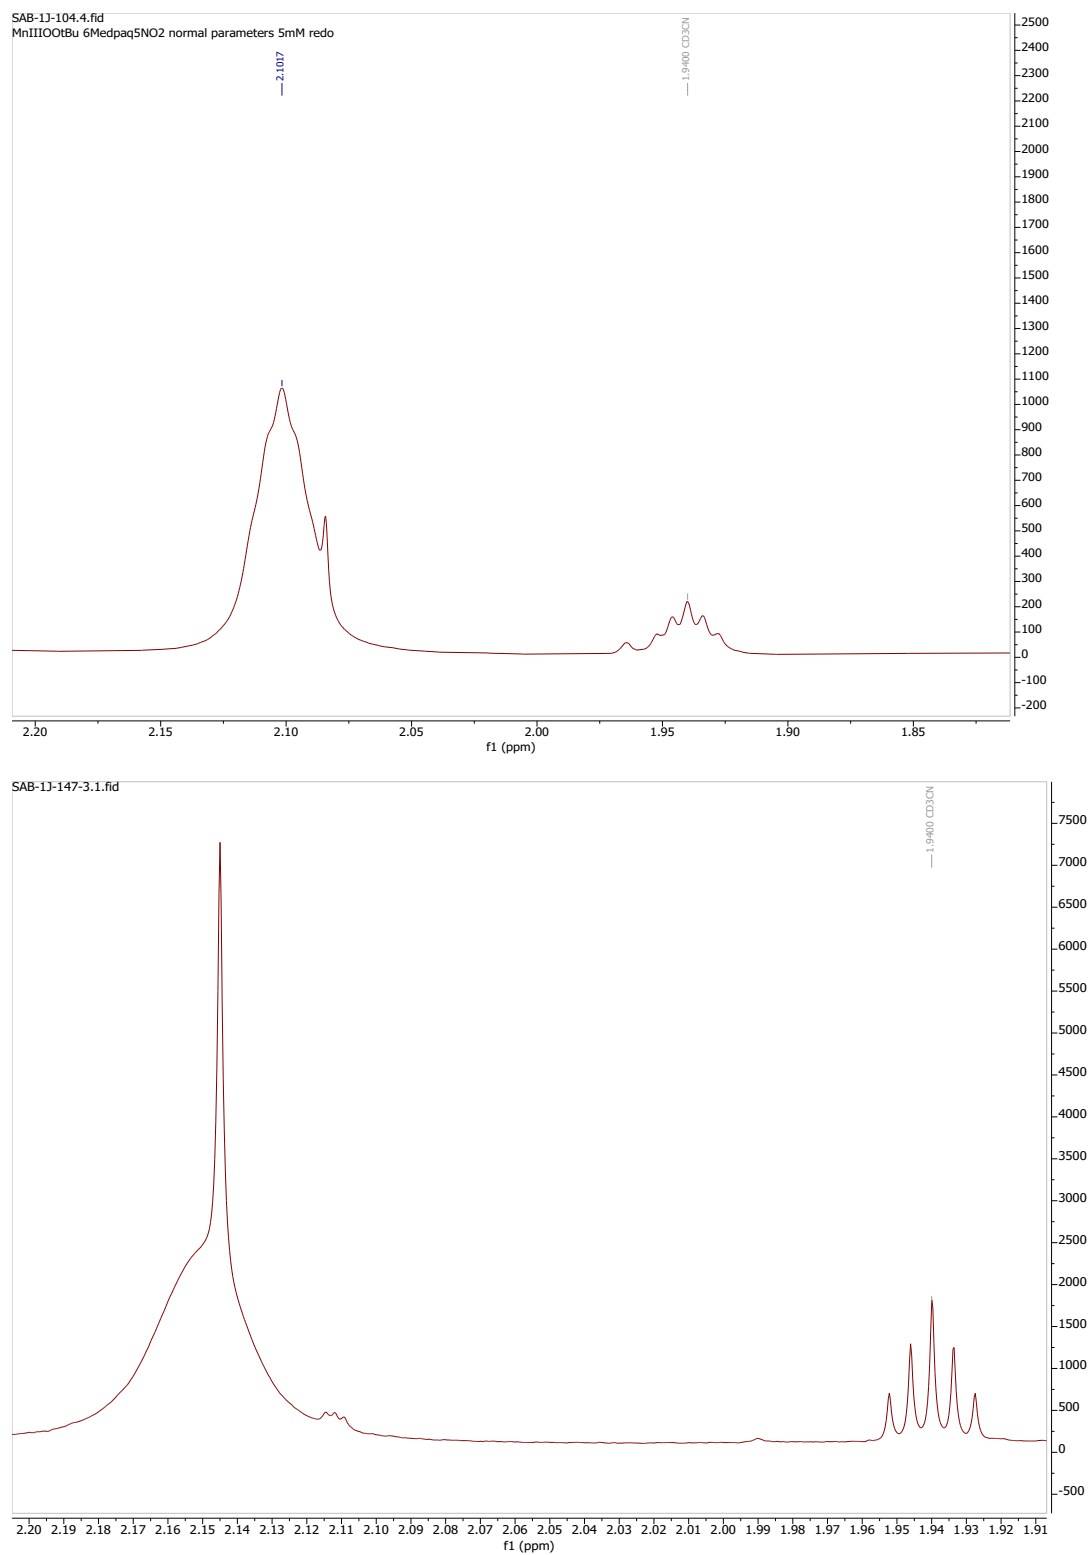

Figure S9. Evans NMR spectrum of **3a** (top) and **3b** (bottom) in CD<sub>3</sub>CN.

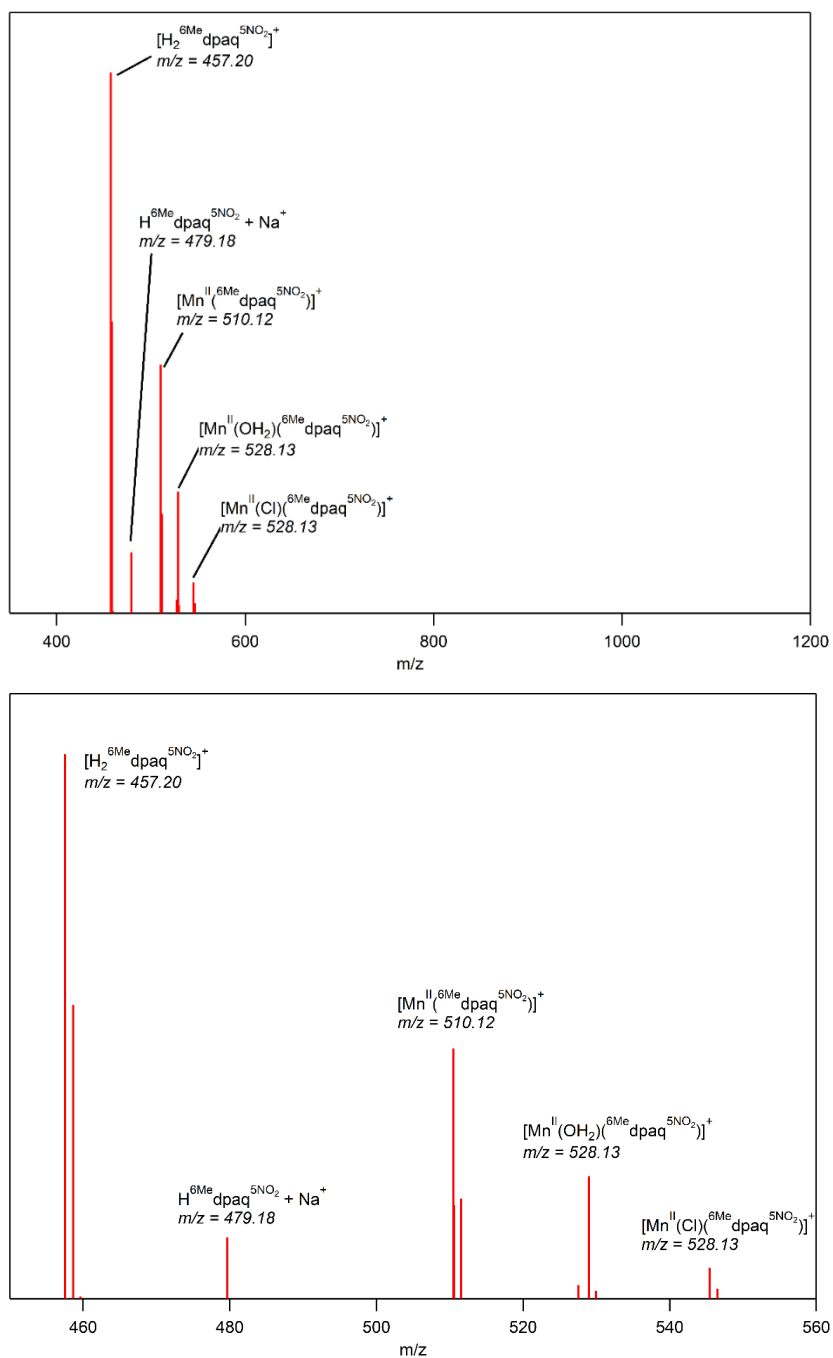

Figure S10. ESI-MS spectrum of **1** in  $\text{CH}_3\text{CN}$ . Both the full spectral region (top) and the region of interest (bottom) are shown.



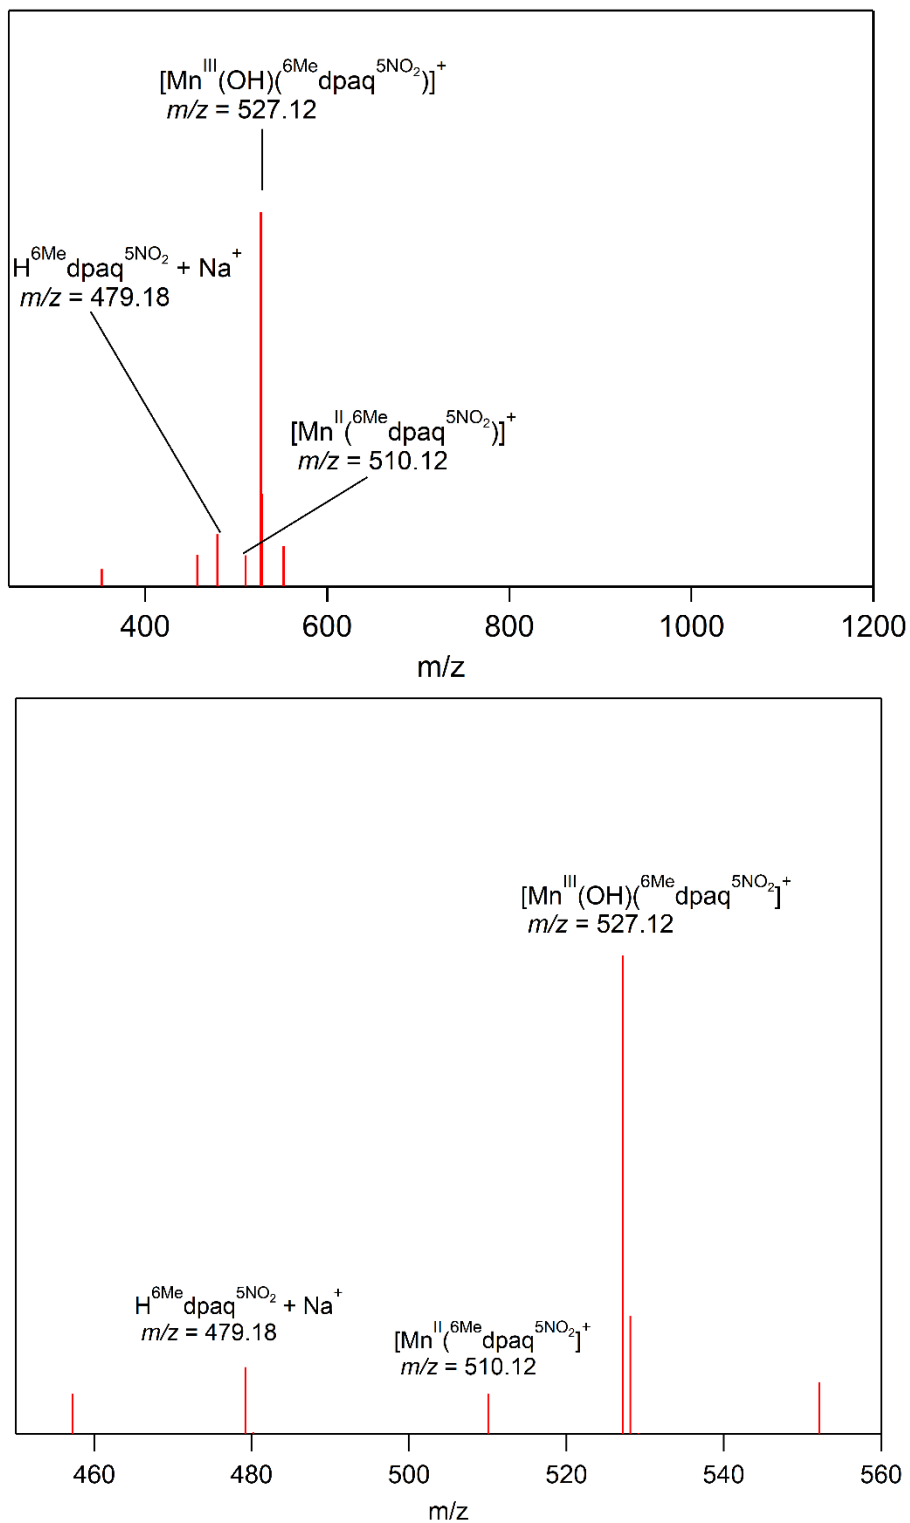

Figure S11. ESI-MS spectrum of **2** in  $\text{CH}_3\text{CN}$ . Both the full spectral region (top) and the region of interest (bottom) are shown.

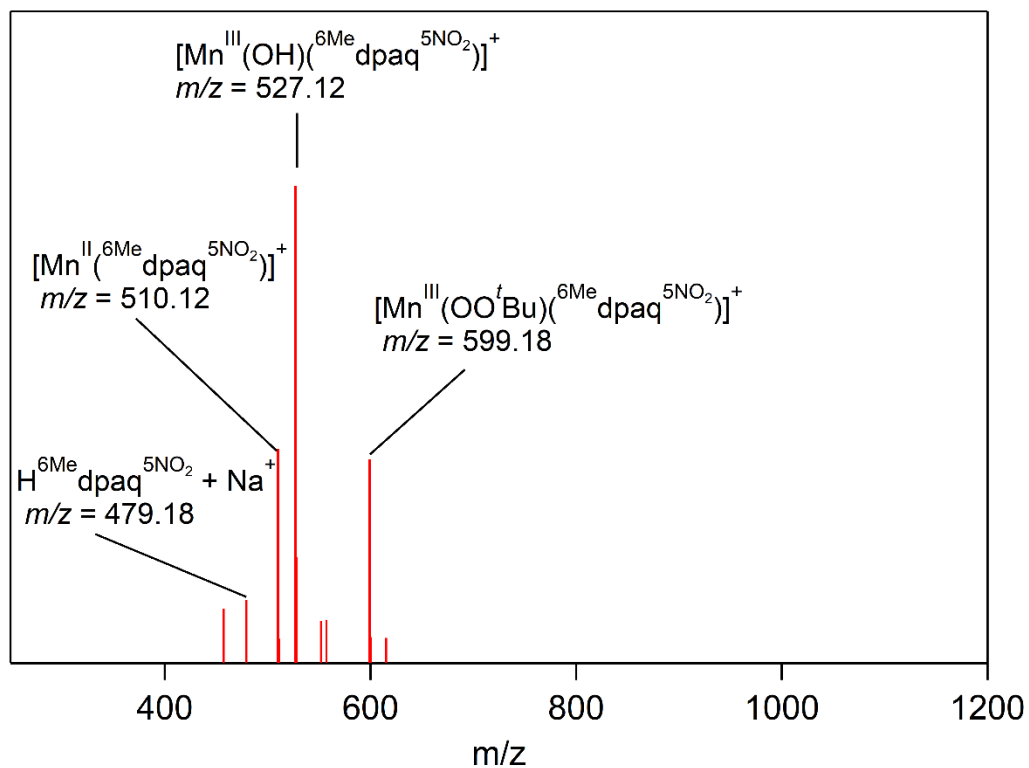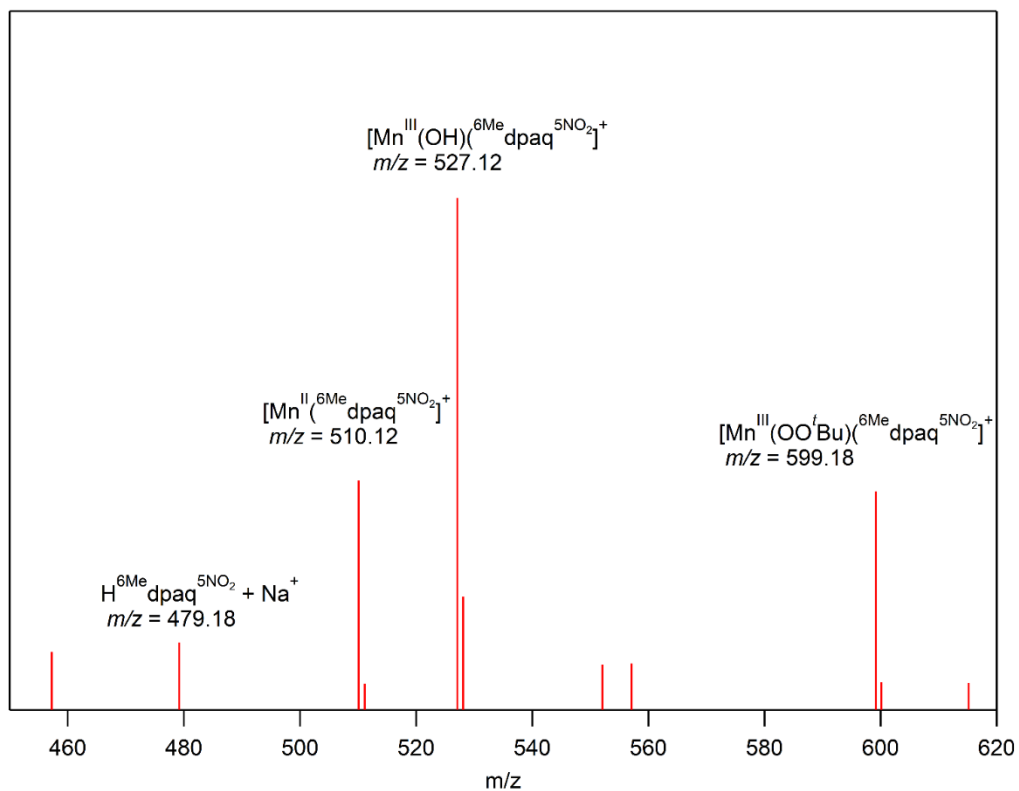

Figure S12. ESI-MS spectrum of **3a** in  $\text{CH}_3\text{CN}$ . Both the full spectral region (top) and the region of interest (bottom) are shown.

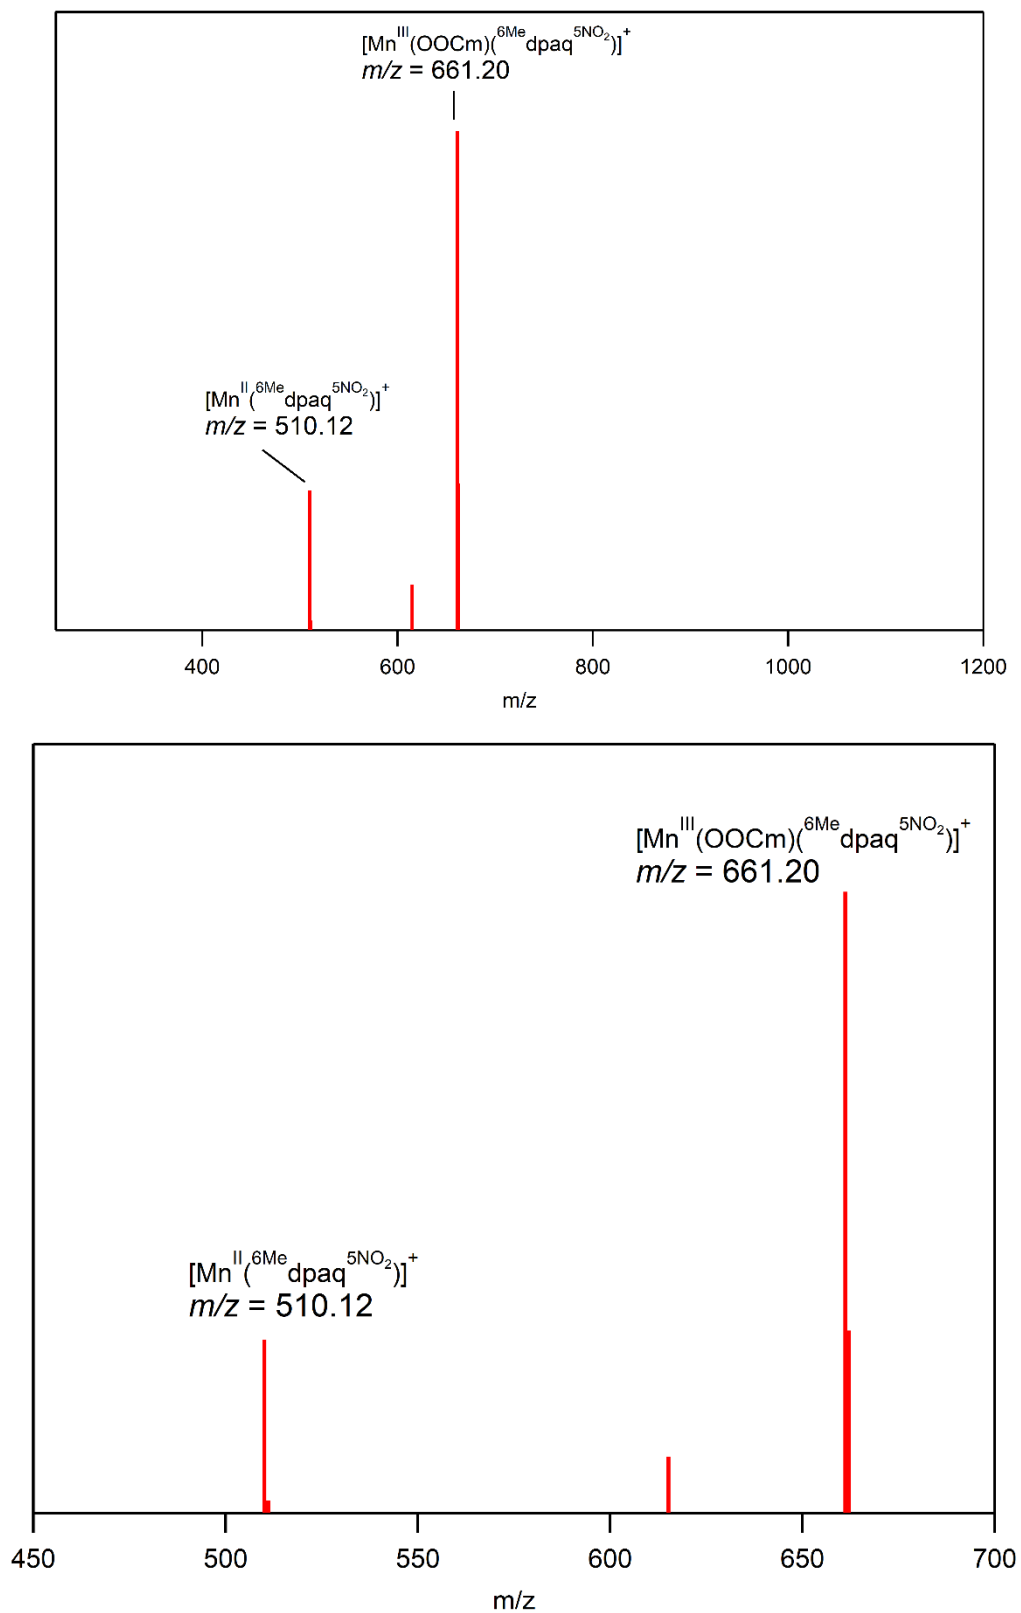

Figure S13. ESI-MS spectrum of **3b** in  $\text{CH}_3\text{CN}$ . Both the full spectral region (top) and the region of interest (bottom) are shown.

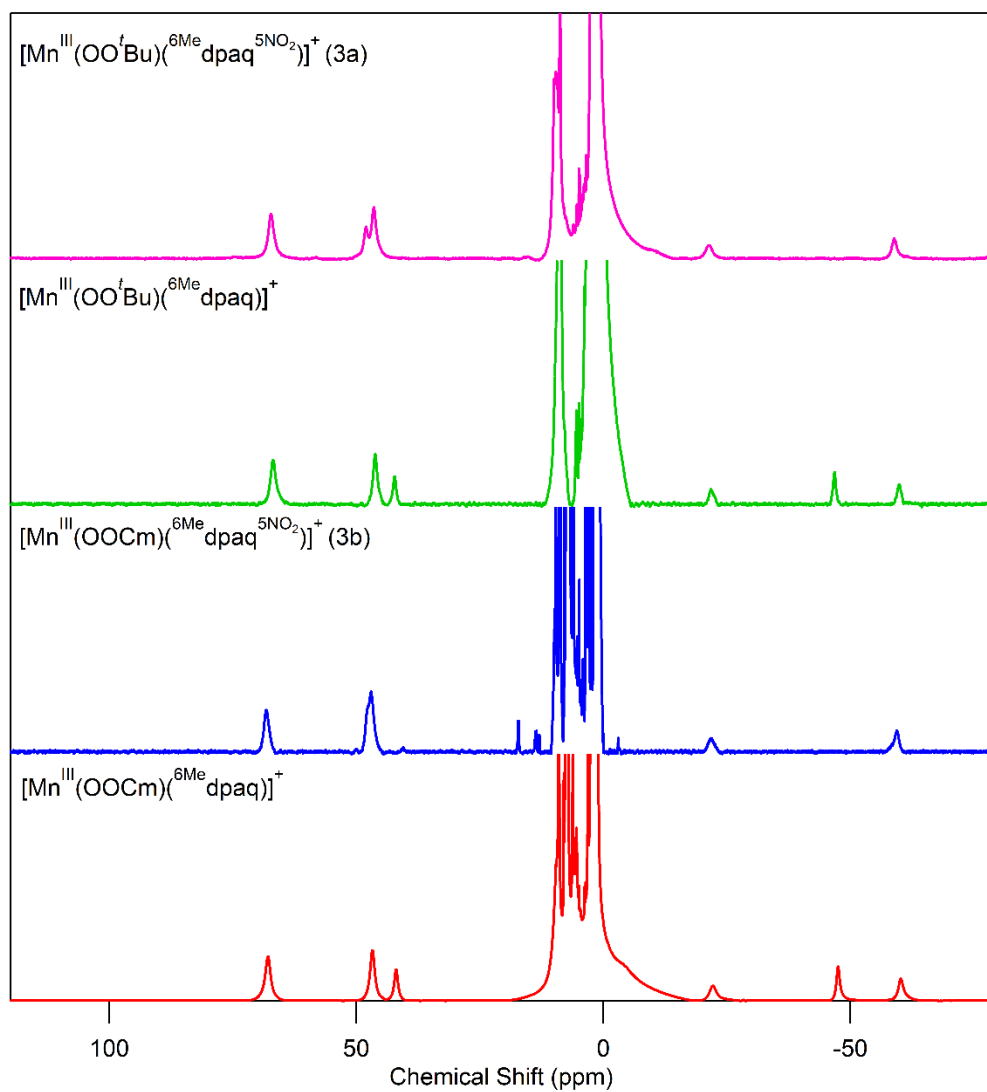

Figure S14.  $^1\text{H}$  NMR spectra of **3a**, **3b**,  $[\text{Mn}^{\text{III}}(\text{OO}^t\text{Bu})(^6\text{Me dpaq})]^+$ , and  $[\text{Mn}^{\text{III}}(\text{OOCm})(^6\text{Me dpaq})]^+$  in  $\text{CD}_3\text{CN}$  at 298 K.

Table S1. <sup>1</sup>H NMR chemical shifts (ppm) for [Mn<sup>III</sup>(OH)(<sup>6</sup>Me dpaq)]<sup>+</sup>, [Mn<sup>III</sup>(OO'Bu)(<sup>6</sup>Me dpaq)]<sup>+</sup>, and [Mn<sup>III</sup>(OOCm)(<sup>6</sup>Me dpaq)]<sup>+</sup>. Complexes in CD<sub>3</sub>CN at 298 K.

| [Mn <sup>III</sup> (OH)( <sup>6</sup> Me dpaq)] <sup>+</sup> | [Mn <sup>III</sup> (OO'Bu)( <sup>6</sup> Me dpaq)] <sup>+</sup> <sup>a</sup> | [Mn <sup>III</sup> (OOCm)( <sup>6</sup> Me dpaq)] <sup>+</sup> <sup>a</sup> |
|--------------------------------------------------------------|------------------------------------------------------------------------------|-----------------------------------------------------------------------------|
| 66.0                                                         | 66.8                                                                         | 67.8                                                                        |
| 51.4                                                         | 46.1                                                                         | 46.7                                                                        |
| 44.8                                                         | 42.2                                                                         | 41.8                                                                        |
| 8.9                                                          | 9.2                                                                          | 8.9                                                                         |
|                                                              |                                                                              | 7.38                                                                        |
|                                                              |                                                                              | 7.26                                                                        |
|                                                              |                                                                              | 6.05                                                                        |
| 5.5                                                          |                                                                              | 5.3                                                                         |
| -9.6                                                         |                                                                              |                                                                             |
| -19.3                                                        | -22.0                                                                        | -22.3                                                                       |
| -45.0                                                        | -46.9                                                                        | -47.6                                                                       |
| -61.6                                                        | -60.0                                                                        | -60.3                                                                       |

<sup>a</sup> Data for these complexes from reference 48.

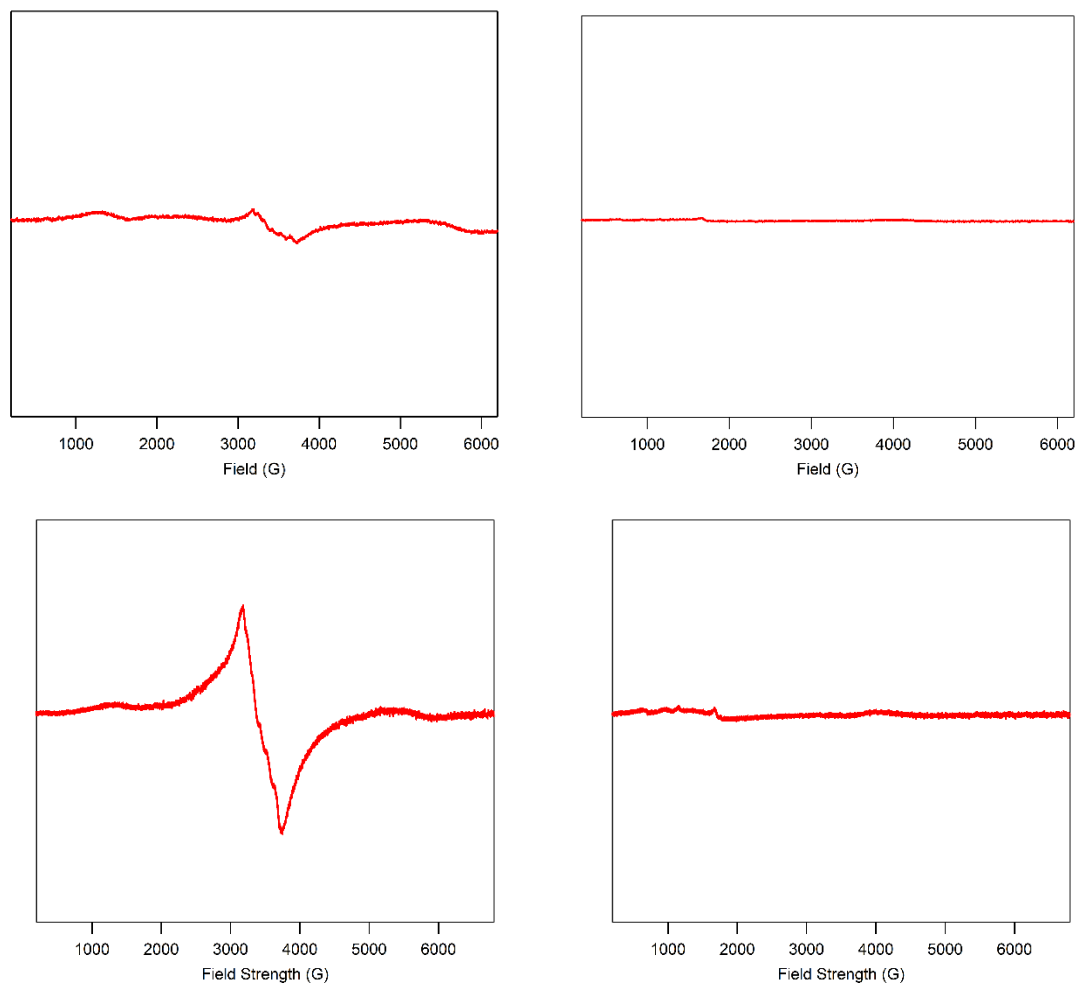

Figure S15. Top: X-band EPR spectra of frozen 3mM 1:1 acetonitrile:toluene solution of **3a** at 10 K in perpendicular-mode (left) and parallel-mode (right). Bottom: X-band EPR spectra of frozen 3 mM 1:1 acetonitrile:toluene solution of **3b** at 10 K in perpendicular-mode (left) and parallel-mode (right).

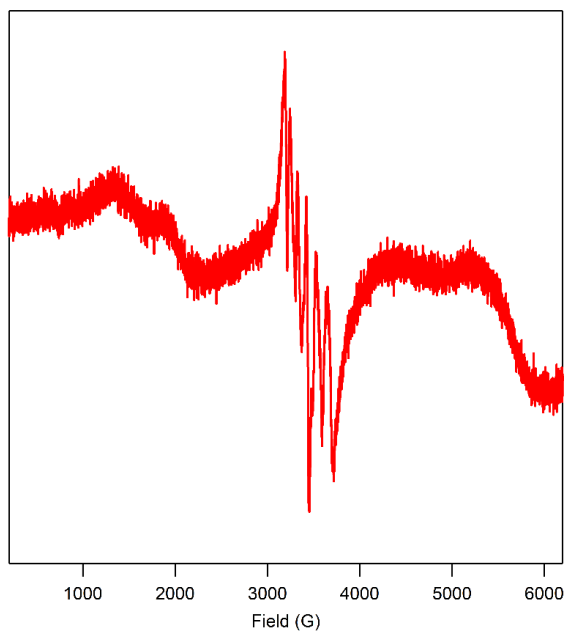

Figure S16. Perpendicular-mode, X-band EPR spectra of frozen 3mM solution of **3a** in acetonitrile at 8 K.

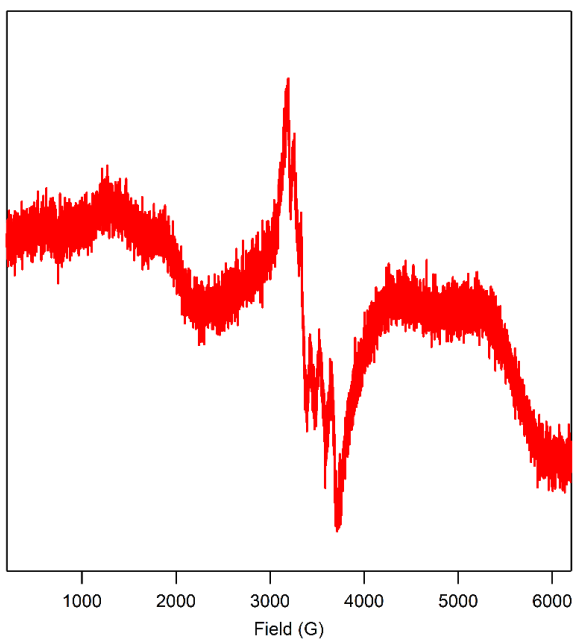

Figure S17. Perpendicular-mode, X-band EPR spectra of frozen 3 mM solution of **3b** in acetonitrile at 8 K.

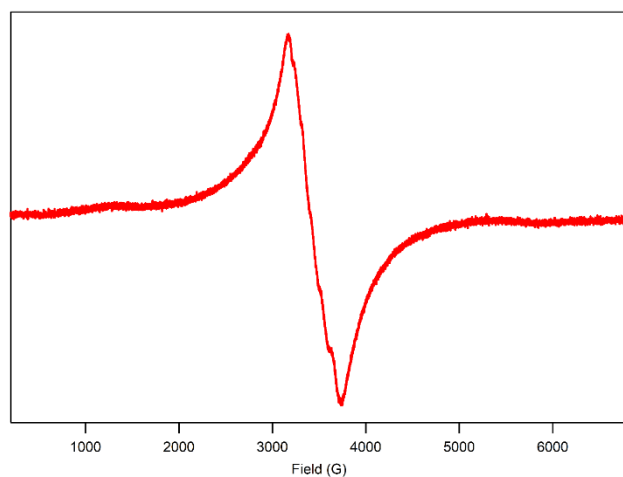

Figure S18. Perpendicular-mode, X-Band EPR spectrum at 7 K of the final products of thermal decay of a 3 mM solution of **3b** with a signal at  $g = 2.01$ .

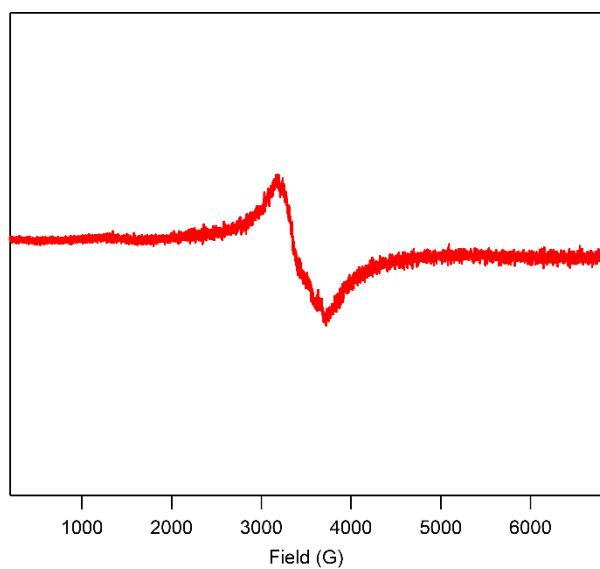

Figure S19. Perpendicular-mode, X-Band EPR spectrum at 8 K of the final products of thermal decay of **3a**.



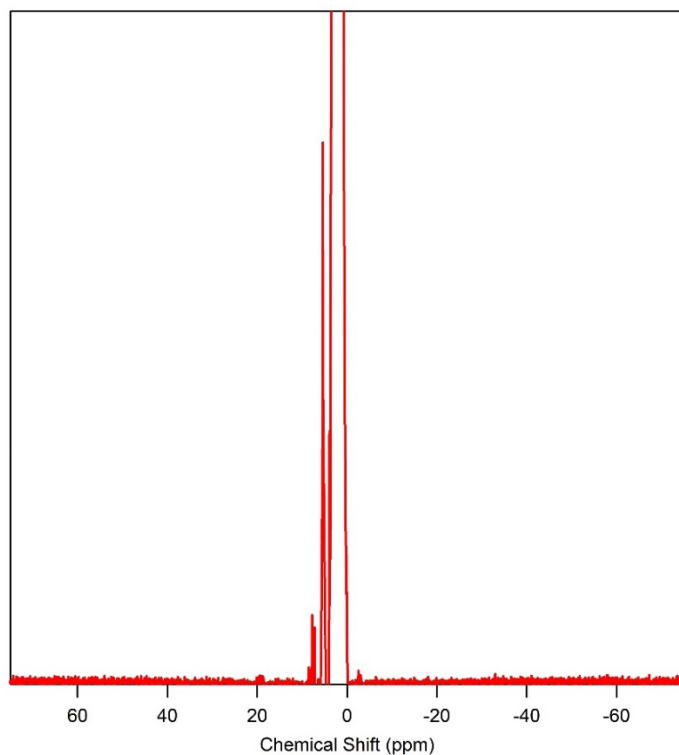

Figure S20.  $^1\text{H}$  NMR spectra of the product of the reaction between **2** and 25 eq. TEMPOH in  $\text{CD}_3\text{CN}$ .

### Reaction of **2** with triphenylphosphine

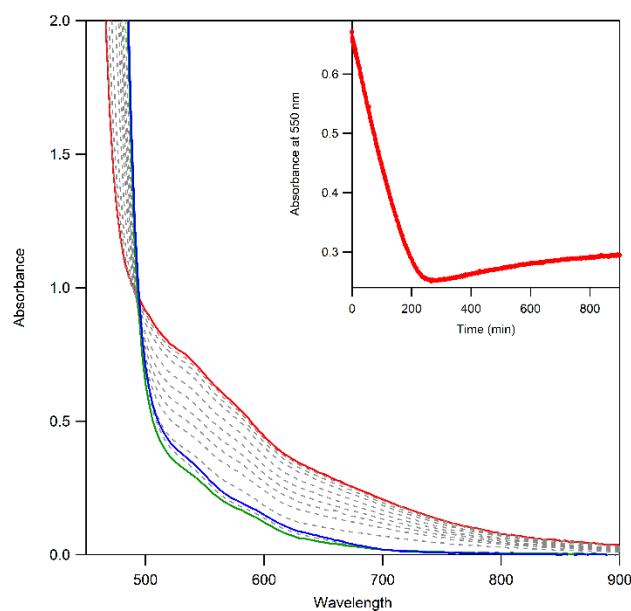

Figure S21. UV-Vis spectra of the reaction of a 3 mM solution of **2** with 10 equiv. triphenylphosphine at 308 K in atmosphere. Absorbance at 550 nm over time is shown in the inset. The initial trace is shown in red, minimum in green, and final in blue.

**PPh<sub>3</sub> Oxidation by 2.** The addition of 10 equiv. PPh<sub>3</sub> to a solution of **2** (3.0 mM in CH<sub>3</sub>CN) at 308 K resulted in the slow loss of intensity of the feature at 550 nm over the course of *ca.* 4 hours, resulting in a spectrum consistent with a mixture of **2** and Mn<sup>II</sup> products. After *ca.* 4 hours, the intensity of the 550 nm feature slowly increases. When performed anaerobically, the same loss of intensity happens but approximately 2 times slower than under atmosphere. In addition, in anaerobic experiments, we did not observe a growth in intensity at 550 nm; however, these trials were stopped after *ca.* 15 hours and the loss of intensity at 550 nm was still not complete at that time. For reactions performed under atmosphere, we analyzed the products by ESI-MS. These experiments showed the presence of peaks at both *m/z* of 262.09 and 278.09, consistent with PPh<sub>3</sub> and PPh<sub>3</sub>O, respectively. The reaction product solution of the anerobic reaction was also analyzed using ESI-MS and showed only the presence of a peak at *m/z* 262.09, consistent with PPh<sub>3</sub> alone.

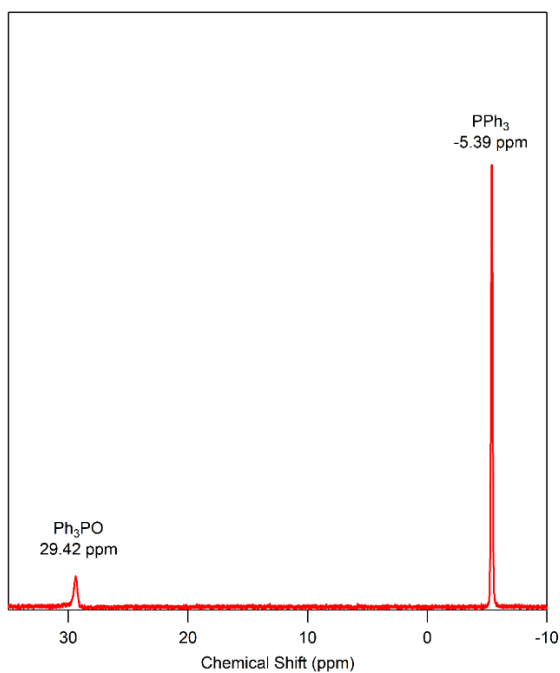

Figure S22. <sup>31</sup>P NMR of the organic products of the reaction between **3a** and PPh<sub>3</sub> in CD<sub>3</sub>CN.

## Single crystal X-ray diffraction analysis

**Instrumentation:** Single crystal X-ray diffraction analyses were carried out on a Bruker D8 Venture equipped with dual sealed tube MoK $\alpha$  ( $\lambda = 0.71073$  Å) anodes operating at 50.0 kV and 1.40 mA (MoK $\alpha$ ) and Helios multilayer X-ray optics.

**Data collection and refinements:** The single crystals were mounted on MicroMesh (MiTeGen) cryoloops with immersion oil at 100 K under a nitrogen cryostream. A total of 105685 and 36433 for **1** and **2**, respectively, using MoK $\alpha$ . Data were collected using  $1^\circ$   $\omega$  and  $\phi$ -scans with 20-30 second exposures per frame using a PHOTON III C14 detector. Preliminary lattice constants and the intensities were integrated using the Bruker APEX4 program. The structures were determined by intrinsic phasing (SHELXT 2014/5)[1] and refined by full-matrix least-squares refinement on F<sup>2</sup> (SHELXL-2017/1)[2] using the Olex2<sup>3</sup> software package using least-squares minimization. The final structural model incorporated anisotropic and isotropic atomic displacement parameters for non-hydrogen and hydrogen atoms, respectively. The hydrogen atoms attached to carbon atoms were eventually placed in calculated position and refine in the riding model sp<sup>2</sup>- or sp<sup>3</sup>-hybridized positions with C–H bond lengths of 0.95 - 0.99 Å. Relevant crystallographic and structure refinement data for labetalol hydrochloride is given in **Table S2**.

**Table S2 Crystal data and structure refinement for 1 and 2**

|                                             | <b>1</b>                                                                         | <b>2</b>                                                                         |
|---------------------------------------------|----------------------------------------------------------------------------------|----------------------------------------------------------------------------------|
| Identification code                         | SAB-1J-146                                                                       | SAB-1J-145                                                                       |
| Empirical formula                           | C <sub>26</sub> H <sub>23</sub> F <sub>3</sub> MnN <sub>6</sub> O <sub>6</sub> S | C <sub>26</sub> H <sub>24</sub> F <sub>3</sub> MnN <sub>6</sub> O <sub>7</sub> S |
| Formula weight                              | 659.509                                                                          | 676.51                                                                           |
| Temperature/K                               | 100                                                                              | 100                                                                              |
| Crystal system                              | triclinic                                                                        | monoclinic                                                                       |
| Space group                                 | P-1                                                                              | P2 <sub>1</sub> /n                                                               |
| a/Å                                         | 9.2724(5)                                                                        | 8.824(2)                                                                         |
| b/Å                                         | 9.3267(5)                                                                        | 24.170(5)                                                                        |
| c/Å                                         | 17.5457(10)                                                                      | 13.339(3)                                                                        |
| $\alpha$ /°                                 | 92.824(2)                                                                        | 90                                                                               |
| $\beta$ /°                                  | 103.391(2)                                                                       | 102.634(7)                                                                       |
| $\gamma$ /°                                 | 111.925(2)                                                                       | 90                                                                               |
| Volume/Å <sup>3</sup>                       | 1353.77(13)                                                                      | 2775.9(11)                                                                       |
| Z                                           | 2                                                                                | 4                                                                                |
| $\rho_{\text{calc}}/\text{cm}^3$            | 1.618                                                                            | 1.619                                                                            |
| $\mu/\text{mm}^{-1}$                        | 0.640                                                                            | 0.629                                                                            |
| F(000)                                      | 675.5                                                                            | 1384.0                                                                           |
| Crystal size/mm <sup>3</sup>                | 0.2 × 0.1 × 0.05                                                                 | 0.1 × 0.05 × 0.05                                                                |
| Radiation                                   | Mo K $\alpha$ ( $\lambda$ = 0.71073)                                             | MoK $\alpha$ ( $\lambda$ = 0.71073)                                              |
| 2 $\Theta$ range for data collection/°      | 5.32 to 72.64                                                                    | 4.6 to 49.422                                                                    |
| Index ranges                                | -15 ≤ h ≤ 15, -15 ≤ k ≤ 15, -29 ≤ l ≤ 29                                         | -10 ≤ h ≤ 10, -28 ≤ k ≤ 28, -15 ≤ l ≤ 15                                         |
| Reflections collected                       | 105685                                                                           | 36433                                                                            |
| Independent reflections                     | 12874 [R <sub>int</sub> = 0.0301, R <sub>sigma</sub> = 0.0175]                   | 4723 [R <sub>int</sub> = 0.1354, R <sub>sigma</sub> = 0.1010]                    |
| Data/restraints/parameters                  | 12874/0/408                                                                      | 4723/0/400                                                                       |
| Goodness-of-fit on F <sup>2</sup>           | 1.057                                                                            | 1.125                                                                            |
| Final R indexes [I >= 2 $\sigma$ (I)]       | R <sub>1</sub> = 0.0309, wR <sub>2</sub> = 0.0856                                | R <sub>1</sub> = 0.0682, wR <sub>2</sub> = 0.1531                                |
| Final R indexes [all data]                  | R <sub>1</sub> = 0.0324, wR <sub>2</sub> = 0.0867                                | R <sub>1</sub> = 0.0977, wR <sub>2</sub> = 0.1650                                |
| Largest diff. peak/hole / e Å <sup>-3</sup> | 0.66/-0.75                                                                       | 0.61/-0.44                                                                       |
| CCDC                                        | 2339541                                                                          | 2339539                                                                          |

## Powder X-ray diffraction (PXRD) analysis

**Instrumentation and measurement method:** The XRD spectrums were collected by a fine-focus Mo-sealed tube running at 50 kV and 1.1 mA ( $\text{Cu K}\alpha = 1.54178 \text{ \AA}$ ) on a Bruker D8 Venture Diffractometer equipped with Helios multilayer optics, an Burkert Photon III C14 detector. Sample preparation included mixing powder with Paratone N oil and placing it in a  $<0.5 \text{ mm}$  nylon loop mounted on a goniometer head. A Bruker APEX4 software package was used to collect and merge, 40 s.  $360^\circ$   $\phi$ -scans with the detector at  $2\theta = -30^\circ, -45^\circ, 30^\circ$  and  $45^\circ$  using a sample-to-detector distance of 100 mm.

### PXRD Spectra:

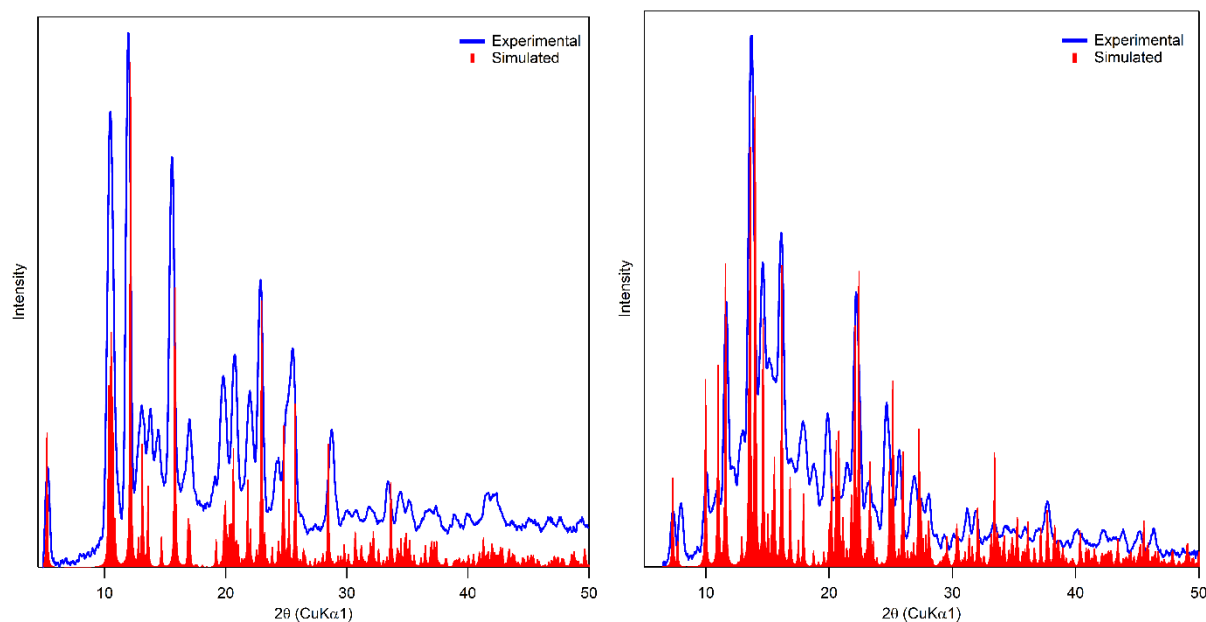

Figure S23. PXRD Spectra of **1** (left) and **2** (right), experimental is shown in blue while simulated is shown in red.

**[Mn<sup>III</sup>(OO<sup>t</sup>Bu)(<sup>6</sup>Me<sub>3</sub>dpaq<sup>5</sup>NO<sub>2</sub>)]<sup>+</sup> (3a)**

|    |                   |                   |                   |
|----|-------------------|-------------------|-------------------|
| Mn | -0.08474677315861 | -0.14857788643680 | 0.00481044839694  |
| O  | -5.92781183107275 | 1.65851981999330  | -3.57996972650446 |
| O  | -4.80444697698100 | 2.39543988208267  | -5.28277163001961 |
| O  | -0.68770434766363 | 0.77509794604490  | 2.42247477820771  |
| O  | 1.50004667494647  | 0.13722511923036  | -3.73174625783758 |
| O  | -0.25522705326730 | -0.46705302168470 | 1.80182395785131  |
| N  | -4.87826012793191 | 1.86457404865627  | -4.18453405215594 |
| N  | 0.98784311849810  | 1.93631926242543  | 0.12036527991743  |
| N  | 1.99327478315709  | -0.66672023566677 | -0.21121548153634 |
| N  | 0.02697655206003  | 0.09097644176930  | -1.93512505939380 |
| N  | -0.02246112078920 | -2.49213685992706 | -0.22346452610706 |
| N  | -2.02485756566192 | 0.36332759892088  | -0.39264962235886 |
| C  | -0.20597348680620 | 0.83532802032914  | 3.79743052872554  |
| C  | -1.02194159290311 | 3.33698336039156  | 0.12436357134238  |
| C  | -2.33208986945809 | -2.78243994670626 | -0.97776130891274 |
| C  | 0.45826348662525  | 3.16388916011995  | -0.04869970719244 |
| C  | 1.27712316249754  | 4.25917972787754  | -0.36615937963166 |
| C  | 2.64947440278397  | 4.08140645082954  | -0.51379556915076 |
| C  | 3.18796396536950  | 2.80926945067860  | -0.30570024389272 |
| C  | 2.31949630929378  | 1.77136403880067  | 0.02151890895162  |
| C  | 2.82072992013620  | 0.40261473189509  | 0.39071666006958  |
| C  | -0.99132926587116 | -3.34643131850048 | -0.61168026522566 |
| C  | -0.74568398584784 | -4.72517326642497 | -0.67589919442051 |
| C  | 0.51452728742269  | -5.22144300899229 | -0.34943560756150 |
| C  | 1.51267354156022  | -4.32378959799363 | 0.03209312254727  |
| C  | 1.19570019038369  | -2.96739200799750 | 0.08675152319795  |
| C  | 2.20534164834820  | -1.93802600660647 | 0.52050835737189  |
| C  | 2.25807041151706  | -0.80677755669456 | -1.67456454207765 |
| C  | 1.23016058246592  | -0.11214263115069 | -2.56749693396995 |
| C  | -2.24707943481267 | 0.68090017170463  | -1.70616642248893 |
| C  | -1.10733606857602 | 0.56313693500246  | -2.57046464356941 |
| C  | -1.25864959353211 | 0.90848714633387  | -3.91418940602750 |
| C  | -2.51095375749615 | 1.34334418161750  | -4.38198474582036 |
| C  | -3.62023300660779 | 1.42890095068031  | -3.55709860544046 |
| C  | -3.53005144662456 | 1.10002256033462  | -2.16777398328891 |
| C  | -4.56314752121082 | 1.17377902629737  | -1.19032589131999 |
| C  | -4.29801904643904 | 0.83665401638630  | 0.12486814856377  |
| C  | -3.00631665795660 | 0.42905515491926  | 0.49727755616364  |
| H  | -1.38025826282066 | 2.71646481143871  | 0.95483917317670  |
| H  | -1.26682377429066 | 4.38871034698643  | 0.32157170082927  |
| H  | -1.55713082528302 | 3.03818011904610  | -0.79009051321678 |
| H  | -2.22846517965100 | -2.02651091971144 | -1.76919081125295 |
| H  | -3.00413150680762 | -3.57217614322820 | -1.33538298953040 |
| H  | -2.79686086553419 | -2.29782944625386 | -0.10726712035884 |
| H  | 0.82471815407175  | 5.24328730155771  | -0.49642082632061 |

|   |                   |                   |                   |
|---|-------------------|-------------------|-------------------|
| H | 3.29429009542660  | 4.92204378608947  | -0.77666184971549 |
| H | 4.26037662419941  | 2.62572071717986  | -0.38654120980505 |
| H | 2.74090403979736  | 0.29327742436084  | 1.48119570333834  |
| H | 3.87840266162012  | 0.27723591594768  | 0.10883664511195  |
| H | -1.54520707118562 | -5.39668553742378 | -0.99130067914474 |
| H | 0.72057926225505  | -6.29215226420140 | -0.40304227113962 |
| H | 2.51893140781072  | -4.66461441128829 | 0.28064290574542  |
| H | 3.23247492690470  | -2.31107069938961 | 0.37457744115425  |
| H | 2.06530559998176  | -1.71972107338220 | 1.59013572200589  |
| H | 3.26361328803135  | -0.44191300916272 | -1.92654256458671 |
| H | 2.21848456415843  | -1.87440635039659 | -1.93657044567749 |
| H | -0.41062924258234 | 0.83586475381431  | -4.58992266545437 |
| H | -2.63380174345271 | 1.61640386051492  | -5.43001108832780 |
| H | -5.55725405784648 | 1.49225625987296  | -1.49397719294822 |
| H | -5.08307037638166 | 0.88867748158586  | 0.87993434268652  |
| H | -2.74290645801935 | 0.17179446283828  | 1.52308319563910  |
| C | 1.32159207959623  | 0.83127832160726  | 3.82334850530762  |
| H | 1.70922341643922  | -0.13391241246366 | 3.46603063104724  |
| H | 1.68394593162770  | 0.97971247659014  | 4.85131511195707  |
| H | 1.71915521488583  | 1.64202693314699  | 3.19452833404742  |
| C | -0.79433284858153 | -0.32495134267412 | 4.59830030240891  |
| H | -0.45439533737682 | -1.28695589834860 | 4.18970602977627  |
| H | -1.89368754506771 | -0.29735879934074 | 4.56508166796854  |
| H | -0.47709602051507 | -0.26093019276620 | 5.65004913765127  |
| C | -0.76559190955144 | 2.18471804335376  | 4.25111975635528  |
| H | -0.34822725018139 | 3.00375005477942  | 3.64668754809720  |
| H | -0.50098746463049 | 2.35890586211874  | 5.30441146151685  |
| H | -1.86179503344364 | 2.19964770866258  | 4.16318687625567  |

**[Mn<sup>III</sup>(OOCm)(<sup>6</sup>Me<sub>4</sub>dpac<sup>5</sup>NO<sub>2</sub>)]<sup>+</sup> (3b)**

|    |                   |                   |                   |
|----|-------------------|-------------------|-------------------|
| Mn | 0.11518773993508  | -0.52408356640229 | 0.01641952515964  |
| O  | -0.30266903281375 | -0.91091334630846 | 1.75292864611730  |
| O  | 1.98127530175803  | -0.34703796777559 | -3.60124417539068 |
| O  | -0.41925835418791 | 0.27356218282580  | 2.58206509112280  |
| O  | -3.79071382121459 | 2.80009858468697  | -5.50916988643114 |
| O  | -5.00426894686127 | 2.66162607797383  | -3.71943547088315 |
| N  | -1.70923267377798 | 0.23743045662132  | -0.49644282402950 |
| N  | 0.09279463401384  | -2.79875925843493 | -0.09263882829243 |
| N  | 0.39799932135189  | -0.23627293974865 | -1.89978931448128 |
| N  | 2.18036452214336  | -1.14435889533492 | -0.07766073226778 |
| N  | 1.24871046061663  | 1.52200264690148  | 0.25991655062450  |
| N  | -3.96772117210570 | 2.45986571107470  | -4.34828940907774 |
| C  | -0.43245653081738 | 1.14845459603254  | 4.73979020389815  |
| C  | -1.39110310659799 | -1.13758619049900 | 4.31228213805316  |
| C  | -2.74472841193974 | 0.36961509883319  | 0.32169987156358  |

|   |                   |                   |                   |
|---|-------------------|-------------------|-------------------|
| C | -3.93534561786364 | 0.97410995824012  | -0.11148940142001 |
| C | -4.03603539457942 | 1.45546851901179  | -1.40532888407291 |
| C | -2.93950223504672 | 1.32467125546703  | -2.30549501335849 |
| C | -2.86073016261450 | 1.76319767218441  | -3.66690666862349 |
| C | -1.71460598350705 | 1.54781563632324  | -4.41556154630694 |
| C | -0.58551417426023 | 0.89250910229875  | -3.89736820527698 |
| C | -0.59778146865572 | 0.44319207757296  | -2.57652924998974 |
| C | -1.77455625775212 | 0.67961757195552  | -1.79013811751418 |
| C | 1.60409891644705  | -0.58683628412860 | -2.46472129558402 |
| C | 2.45130330818018  | -1.43197254971403 | -1.51598239515686 |
| C | 2.30517554212428  | -2.34626574703863 | 0.77759825469797  |
| C | 1.19779337982135  | -3.32090427612941 | 0.46618971257469  |
| C | 1.31192286573471  | -4.67990501685062 | 0.75420880301792  |
| C | 0.23591251302110  | -5.51407590642650 | 0.44971390740369  |
| C | -0.89703040448607 | -4.96809398388444 | -0.15365924187527 |
| C | -0.94506559789318 | -3.59462671781037 | -0.42003190120866 |
| C | 3.05106473777427  | -0.04966113939823 | 0.41203343740108  |
| C | 2.54102662725003  | 1.28843466156031  | -0.04912387637760 |
| C | 3.34470140374265  | 2.22893729067411  | -0.68260307868857 |
| C | 2.78815108250365  | 3.47663022070792  | -0.98629435837691 |
| C | 1.47872588338004  | 3.73932958404868  | -0.60017477864477 |
| C | 0.72329332222593  | 2.74030537966420  | 0.03830142006032  |
| C | -2.13570885664461 | -2.95346172470410 | -1.07117626898583 |
| C | -0.67252248475550 | 3.01648979673820  | 0.52164215299882  |
| C | -0.26569399336760 | -0.16413496907628 | 3.96728158755865  |
| H | -1.33276493530848 | -1.44592156222387 | 5.36618869456812  |
| H | -2.35835933090088 | -0.63772188206412 | 4.15523440766636  |
| H | -1.35119626877698 | -2.03191768048995 | 3.67699585470207  |
| H | -0.28299200705426 | 0.96374294829545  | 5.81332648625059  |
| H | 0.29678477958093  | 1.90152519135799  | 4.41240357012645  |
| H | -1.44436014582370 | 1.55181324586093  | 4.58668796343616  |
| H | -2.60454712099385 | -0.00185248374691 | 1.33705063040152  |
| H | -4.77263473962986 | 1.07060764227942  | 0.58056131786900  |
| H | -4.94584027254979 | 1.93909305113593  | -1.75029158936613 |
| H | -1.70875937091555 | 1.90617005409651  | -5.44440245628846 |
| H | 0.29240763603989  | 0.72918688527671  | -4.51670966882486 |
| H | 2.19443097649234  | -2.48225087260678 | -1.71636944797069 |
| H | 3.51632172542917  | -1.28987986409618 | -1.74892162687603 |
| H | 2.21612096133248  | -2.01767650276515 | 1.82429237950647  |
| H | 3.29030606300113  | -2.82619048494882 | 0.64946131316640  |
| H | 2.22566777899301  | -5.07204447471093 | 1.20383822134571  |
| H | 0.28619297174738  | -6.58281231254571 | 0.66747528854720  |
| H | -1.74338354037518 | -5.59907774860957 | -0.42877923925042 |
| H | 4.09253511249676  | -0.21461471346253 | 0.09426344933320  |
| H | 3.01217436743922  | -0.07600560301981 | 1.50937140571847  |
| H | 4.37907421159333  | 1.99200984125928  | -0.93490691406453 |



|   |                   |                   |                   |
|---|-------------------|-------------------|-------------------|
| H | 3.37876157683096  | 4.23713182083781  | -1.50060589635541 |
| H | 1.02823859671098  | 4.71584535383695  | -0.78499930254279 |
| H | -2.72810995415328 | -2.40123730766508 | -0.32505864287402 |
| H | -2.78590749467300 | -3.70702581530020 | -1.53398305027154 |
| H | -1.81428023507585 | -2.23771644389040 | -1.84048311134456 |
| H | -1.39640414280472 | 2.97667088313212  | -0.30788986796373 |
| H | -0.72771073855292 | 4.02800046658985  | 0.95005262560997  |
| H | -0.95766629317296 | 2.28611231340111  | 1.28694332749179  |
| C | 1.13737509603888  | -0.74857666462569 | 4.13583889550824  |
| C | 1.35723580678661  | -2.08923033121673 | 4.48339302692723  |
| H | 0.51225317148105  | -2.75499929841527 | 4.65803103970648  |
| C | 2.65668341404003  | -2.59212686002252 | 4.62463339978409  |
| H | 2.80358472756423  | -3.63594597867560 | 4.91105928756007  |
| C | 3.76048105684743  | -1.75964366100853 | 4.42598417638426  |
| H | 4.77310324412170  | -2.14712109085298 | 4.55807375900820  |
| C | 3.55480506347297  | -0.41970841985662 | 4.07688024045810  |
| H | 4.40981042020881  | 0.24458801319302  | 3.93116770302474  |
| C | 2.25654348579219  | 0.07577110778291  | 3.92771494038087  |
| H | 2.10915746643836  | 1.12031563675203  | 3.64483102957392  |

## References

1. Sheldrick, G.M. SHELXT - integrated space-group and crystal-structure determination. *Acta Crystallogr A Found Adv* **2015**, *71*, 3-8, doi:10.1107/S2053273314026370.
2. Sheldrick, G.M. Crystal structure refinement with SHELXL. *Acta Crystallogr C Struct Chem* **2015**, *71*, 3-8, doi:10.1107/S2053229614024218.
